# Supplementary material for: Arbuscular mycorrhizal fungi (AMF) enhanced the growth, yield, fiber quality and phosphorus regulation in upland cotton (Gossypium hirsutum L.)
Source: PubMed Central journal article supplement (PMC7005850; doi:10.1038/s41598-020-59180-3), 2020-02-07
Supplement: 41598_2020_59180_MOESM1_ESM.pdf [file 41598_2020_59180_MOESM1_ESM.pdf]

# **Arbuscular mycorrhizal fungi (AMF) enhanced the growth, yield, fiber quality and phosphorus regulation in upland cotton (*Gossypium hirsutum* L.)**

**Xinpeng Gao<sup>1, 2, a</sup>, Huihui Guo<sup>1, a</sup>, Qiang Zhang<sup>1</sup>, Haixia Guo<sup>1</sup>, Li Zhang<sup>1</sup>, Changyu Zhang<sup>1</sup>, Zhongyuan Gou<sup>1</sup>, Yan Liu<sup>1</sup>, Junmei Wei<sup>1</sup>, Aiyun Chen<sup>1</sup>, Zhaohui Chu<sup>1\*</sup> and Fanchang Zeng<sup>1\*</sup>**

<sup>1</sup> *State Key Laboratory of Crop Biology, Shandong Agricultural University, Tai'an 271018, P. R. China*

<sup>2</sup> *Novogene Bioinformatics Institute, Beijing 100083, P. R. China*

\*Corresponding author E-mail

Zhaohui Chu: [zchu@sdau.edu.cn](mailto:zchu@sdau.edu.cn), Fanchang Zeng: [fczeng@sdau.edu.cn](mailto:fczeng@sdau.edu.cn).

Mailing address: State Key Laboratory of Crop Biology, Shandong Agricultural University, Tai'an 271018, P. R. China

Tel: +86-538-8241828

<sup>a</sup> Equal contribution to this work

## Supplementary Data:

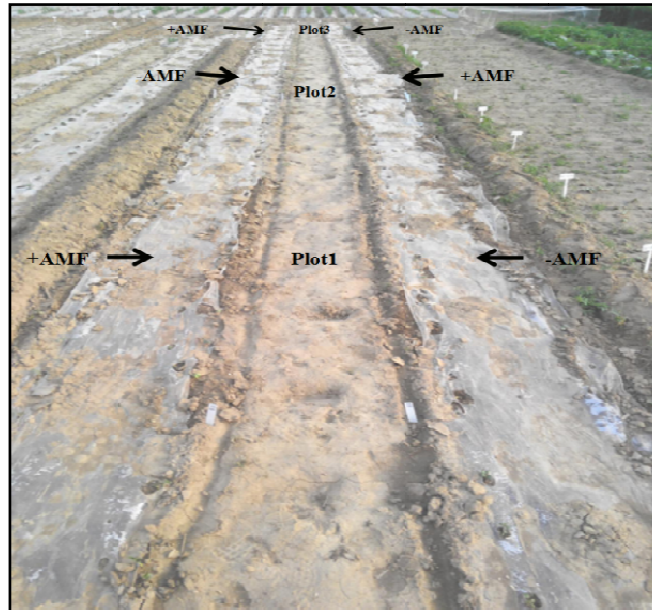

**Fig. S1** The design of experimental plots in the field. +AMF indicate AMF was inoculated by *R. irregularis*, -AMF none.

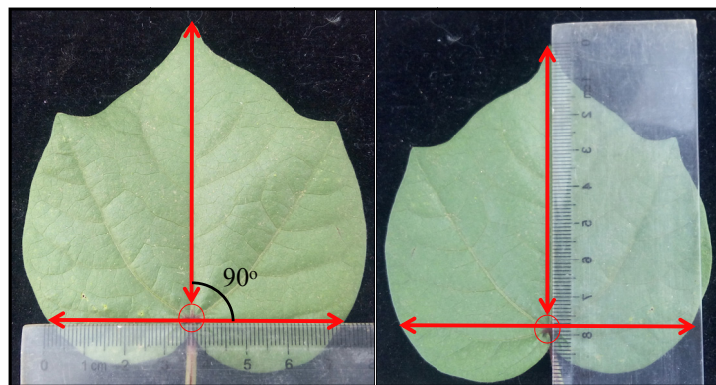

**Fig. S2** Method for measuring leaf width/length. The fourth leaf from the top of the main stem was the functional leaf. The distance from the leaf tip to the red point of the leaf base is the length of the functional leaf. The width of the functional leaf is measured through the red point of the leaf base, perpendicular to the vertical length axis. The seedling was considered a relative strong seedling if the leaf width was greater than the length; otherwise, the seedling was considered a relative weak seedling.

**Table S1** The sequences of phosphate transporter family genes primers in cotton

| Primer name        | Forward (sense) (5'-3') | Reverse (antisense) (5'-3') |
|--------------------|-------------------------|-----------------------------|
| <i>Gh_D02G0263</i> | TCAATGCGGAACAAGAGAAG    | CCGCAGAGTGCAATAAGTGT        |
| <i>Gh_A02G0202</i> | GCAGCTGCTGTTAATGGTGT    | GGATAATCACCACCGATTCC        |
| <i>Gh_D02G0264</i> | TTGGCGGATCATACTGATGT    | CTTCTCTTGTTCCGCATTGA        |
| <i>Gh_A02G0203</i> | GCAGCTGCTGTTAATGGTGT    | GGATAATCACCACCGATTCC        |
| <i>Gh_A07G1937</i> | CTGGGATGGGTTTCTTCACT    | TTATCACCAAGCCAACCAAA        |
| <i>Gh_D07G2154</i> | GGCTATCCCGTATGACCACT    | GACGAATGTGGTGGCATTAG        |
| <i>Gh_A07G1600</i> | TGGGAGTGATCAGCTTCTTG    | TCTGTTGTCCACCCTGTGTT        |
| <i>Gh_D07G1801</i> | ATCGAAAGGGAAATCACTGG    | TCGTCCACCTTGTGTTTGAT        |
| <i>Gh_A09G0566</i> | CTATTGCCTCTGGCTTGCA     | TAAGCAGGTGCCTTGTATGC        |
| <i>Gh_D09G0567</i> | ATCCCGGCTGCTCTTACTTA    | CTTTGCAACAAGGGCAGTAA        |
| <i>Gh_A10G1124</i> | ATCGCTTATCGCACTTTGTG    | ATTGAATTGTGAACCTGCCA        |
| <i>Gh_D10G1372</i> | ATCGCTTATCGCACTTTGTG    | ATTGAATTGTGAACCTGCCA        |
| <i>Gh_A11G1201</i> | TGGTGCAATTTGGATTCTTGT   | GACTCCAATACCAGCAGGGT        |
| <i>Gh_D11G1359</i> | ACGGTGTTTCATGTTTCACT    | ACAAGAATCCAATGCACCA         |
| <i>GhUB7</i>       | GAAGGCATTCCACCTGACCAAC  | CTTGACCTTCTTCTTGTGCTTG      |
